# Supplementary material for: Structural studies and physicochemical properties of l-valine hydrochloride monohydrate
Source: Royal Society of Chemistry journal article supplement (doi:10.1039/c3ce41079j), 2013-01-01
Supplement: c3ce41079j.pdf [file c3ce41079j.pdf]

## **Supplementary Information**

### **Structural studies and physicochemical properties of L-valine hydrochloride monohydrate**

**Soma Adhikari,<sup>a</sup> Saikat K. Seth<sup>b</sup> and Tanusree Kar<sup>a\*</sup>**

<sup>a</sup> Indian Association for the Cultivation of Science, Jadavpur, Kolkata – 700032, India

<sup>b</sup> Department of Physics, M. G. Mahavidyalaya, Bhupatinagar, Purba Medinipur, West Bengal –  
721425, India

*Corresponding author E-mail: mstk@iacs.res.in*

**Fax:** +91 33 24732805

**Table S1. Crystal data and structure refinement parameters for (L.T.)and(R.T.) structures.**

| Structure                                           | L.T. (Present study)                                                                          | R.T.                                                                                          |
|-----------------------------------------------------|-----------------------------------------------------------------------------------------------|-----------------------------------------------------------------------------------------------|
| Empirical formula                                   | C <sub>5</sub> H <sub>12</sub> NO <sub>2</sub> <sup>+</sup> Cl <sup>-</sup> .H <sub>2</sub> O | C <sub>5</sub> H <sub>12</sub> NO <sub>2</sub> <sup>+</sup> Cl <sup>-</sup> .H <sub>2</sub> O |
| Formula Weight                                      | 171.62                                                                                        | 171.62                                                                                        |
| Temperature (K)                                     | 120(2)                                                                                        | 293(2)                                                                                        |
| Wavelength (Å)                                      | 0.71073                                                                                       | 0.71073                                                                                       |
| Crystal system                                      | Orthorhombic                                                                                  | Orthorhombic                                                                                  |
| space group                                         | P2 <sub>1</sub> 2 <sub>1</sub> 2 <sub>1</sub>                                                 | P2 <sub>1</sub> 2 <sub>1</sub> 2 <sub>1</sub>                                                 |
| a, b, c (Å)                                         | 6.115(2), 6.850(1), 20.781(2)                                                                 | 6.155(1), 6.828(1), 21.099(3)                                                                 |
| α, β, γ (°)                                         | 90.0, 90.0, 90.0                                                                              | 90.0, 90.0, 90.0                                                                              |
| Volume (Å <sup>3</sup> )                            | 870.5(3)                                                                                      | 886.7(2)                                                                                      |
| Z / Density (calc.) (Mg/m <sup>3</sup> )            | 4 / 1.310                                                                                     | 4 / 1.286                                                                                     |
| Absorption coefficient (mm <sup>-1</sup> )          | 0.396                                                                                         | 0.389                                                                                         |
| F(000)                                              | 368                                                                                           | 368                                                                                           |
| Crystal size (mm <sup>3</sup> )                     | 0.28 × 0.19 × 0.09                                                                            | 0.48 × 0.36 × 0.32                                                                            |
| θ range for data collection (°)                     | 1.96 to 24.97                                                                                 | 1.93 to 27.48                                                                                 |
| Limiting indices                                    | -7<=h<=6,-8<=k<=8,<br>-24<=l<=24                                                              | -7<=h<=7,-8<=k<=8,<br>-27<=l<=27                                                              |
| Reflections collected / unique                      | 8018/1522[R(int)=0.0372]                                                                      | 2442/2020[R(int)=0.0229]                                                                      |
| Completeness to θ (%)                               | 100.0                                                                                         | 100.0                                                                                         |
| Absorption correction                               | Semi-empirical from<br>equivalents                                                            | Psi-scan                                                                                      |
| Max. and min. transmission                          | 0.96 and 0.91                                                                                 | 0.88 and 0.84                                                                                 |
| Refinement method                                   | Full-matrix least-squares on F <sup>2</sup>                                                   | Full-matrix least-squares on F <sup>2</sup>                                                   |
| Data/restraints/parameters                          | 1522 / 0 / 95                                                                                 | 2020 / 0 / 148                                                                                |
| Goodness-of - fit on F <sup>2</sup>                 | 1.171                                                                                         | 0.973                                                                                         |
| Extinction coefficient                              | 0.066(4)                                                                                      | 0.065(5)                                                                                      |
| Final R indices [I > 2σ(I)]                         | R1=0.0178, wR2=0.0465                                                                         | R1=0.355, wR2=0.0809                                                                          |
| R indices (all data)                                | R1=0.0178, wR2=0.0465                                                                         | R1=0.0433, wR2=0.0832                                                                         |
| Largest diff. peak and hole<br>(e.Å <sup>-3</sup> ) | 0.166 and -0.141                                                                              | 0.295 and -0.159                                                                              |

$R_1 = \sum ||F_o| - |F_c|| / \sum |F_o|$ ,  $wR_2 = [\sum \{(F_o^2 - F_c^2)^2\} / \sum \{w(F_o^2)^2\}]^{1/2}$ ,  $w = 1 / \{\sigma^2(F_o^2) + (aP)^2 + bP\}$ , where  $a = 0.0157$  and  $b = 0.1750$  for (L.T.) and  $a = 0.0465$  and  $b = 0.0$  for (R.T.) structure.  $P = (F_o^2 + 2F_c^2) / 3$  for both the structures.

**Table S2. Hydrogen bonding geometry of C<sub>5</sub>H<sub>14</sub>N<sub>1</sub>O<sub>3</sub>Cl(L.T.) (Å, °).**

| D–H···A       | d(D–H) | d(H···A) | d(D···A) | D–H···A | Symmetry         |
|---------------|--------|----------|----------|---------|------------------|
| O2–H2···Cl1   | 0.82   | 2.20     | 3.010(2) | 172     | x, 1+y, z        |
| O1W–H1W···Cl1 | 0.81   | 2.37     | 3.178(2) | 172     | 1/2+x, 1/2-y, -z |
| O1W–H2W···Cl1 | 0.86   | 2.31     | 3.156(2) | 168     | ---              |
| N1–H1C···O1   | 0.89   | 2.36     | 2.873(2) | 117     | 1/2+x, 3/2-y, -z |
| N1–H1A···O1W  | 0.89   | 1.98     | 2.848(2) | 165     | ---              |
| N1–H1C···O1W  | 0.89   | 2.02     | 2.861(2) | 157     | 1/2+x, 3/2-y, -z |
| N1–H1B···Cl1  | 0.89   | 2.42     | 3.237(2) | 153     | 1+x, y, z        |
| C1–H1F···Cl1  | 0.96   | 2.83     | 3.750(2) | 162     | 1+x, y, z        |
| C3–H3···O2    | 0.98   | 2.54     | 2.914(2) | 103     | ---              |
